# Supplementary material for: Identification of Key Pathways Associated With Residual Feed Intake of Beef Cattle Based on Whole Blood Transcriptome Data Analyzed Using Gene Set Enrichment Analysis
Source: PubMed Central journal article supplement (PMC9062580; doi:10.3389/fvets.2022.848027), 2022-04-18
Supplement: Image_1.pdf [file Image_1.pdf]

A.

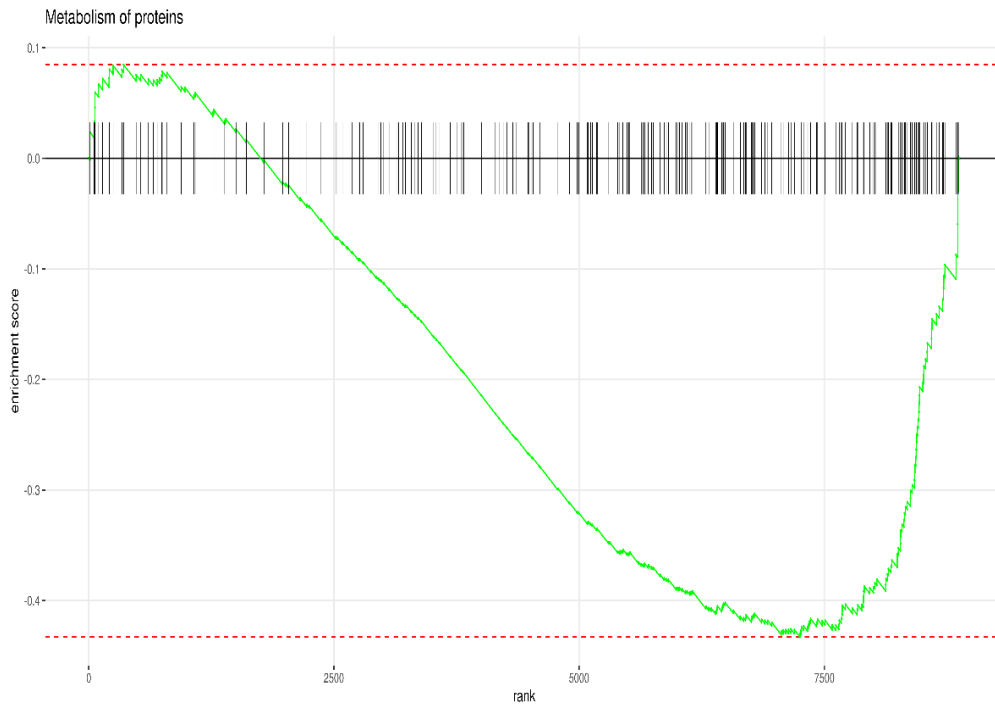

B.

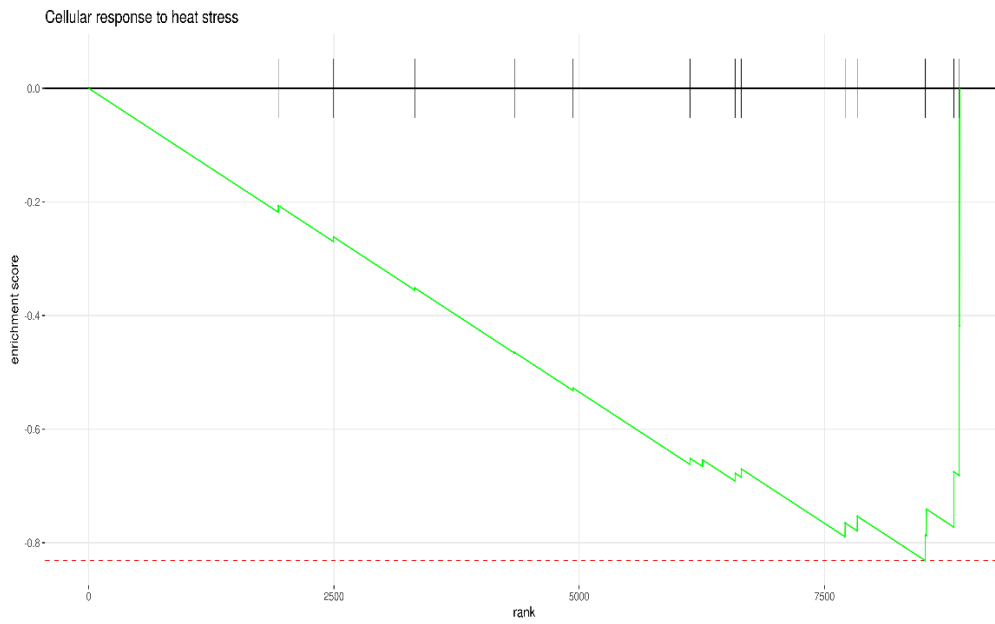

C.

Regulation of HSF1-mediated heat shock response

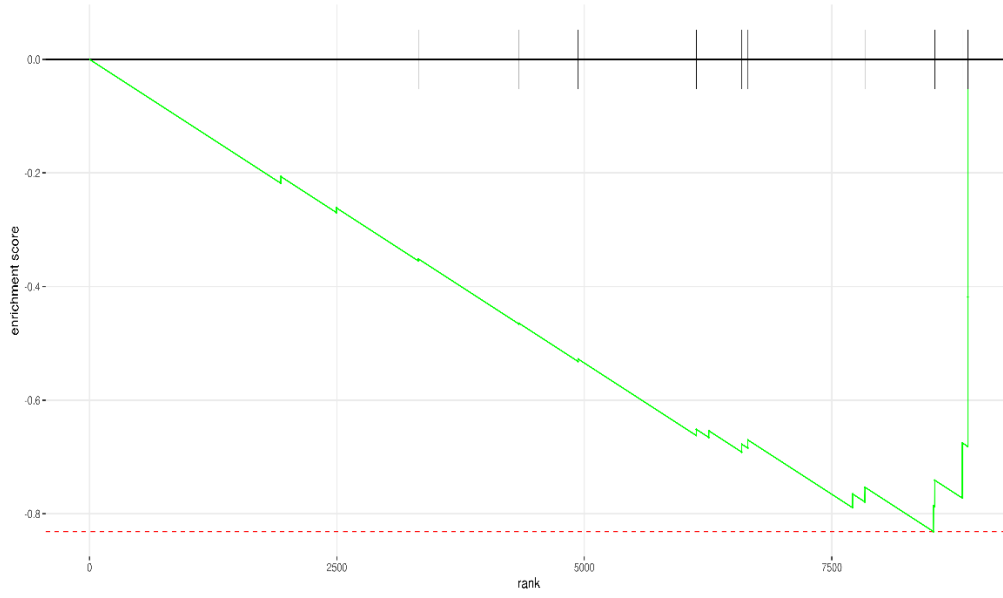

D.

Cellular responses to external stimuli

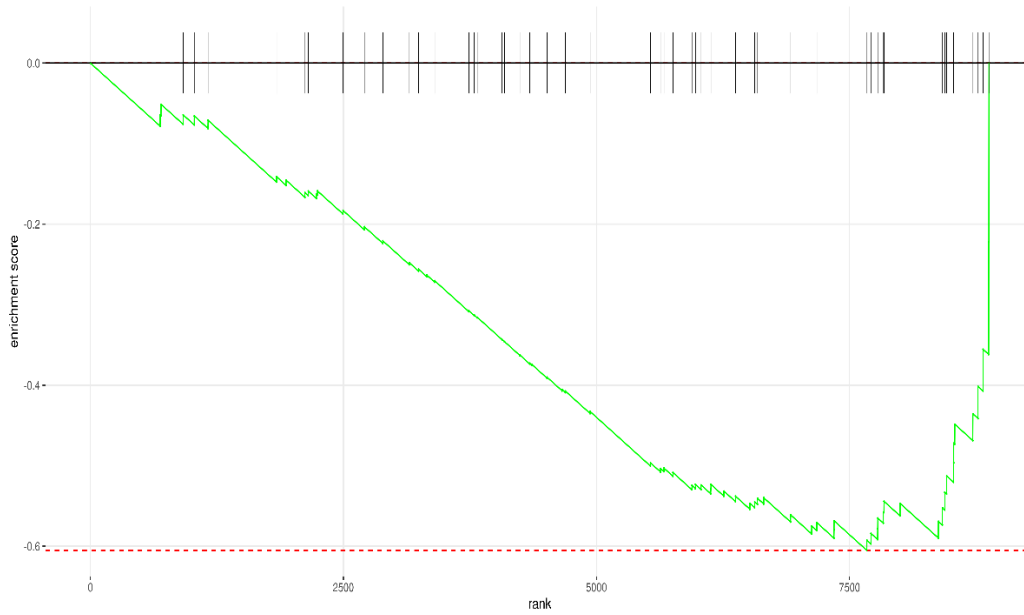

E.

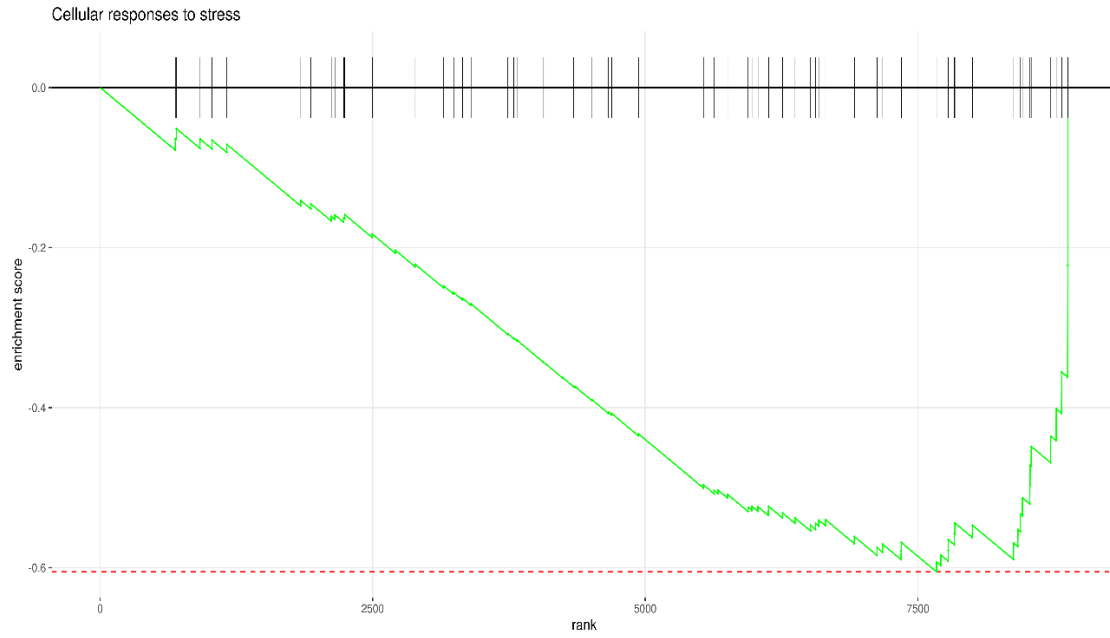

Figure S1. Gene set enrichment analysis (GSEA)-enrichment plots of representative pathways inhibited in high-RFI compared to low-RFI beef steers; reactome metabolism of proteins (A), cellular response to heat stress (B), regulation of HSF1-mediated heat shock response (C), cellular response to external stimuli (D), and cellular response to stress (E).
