# Supplementary material for: Identification of Key Pathways Associated With Residual Feed Intake of Beef Cattle Based on Whole Blood Transcriptome Data Analyzed Using Gene Set Enrichment Analysis
Source: PubMed Central journal article supplement (PMC9062580; doi:10.3389/fvets.2022.848027), 2022-04-18
Supplement: Image_2.pdf [file Image_2.pdf]

A.

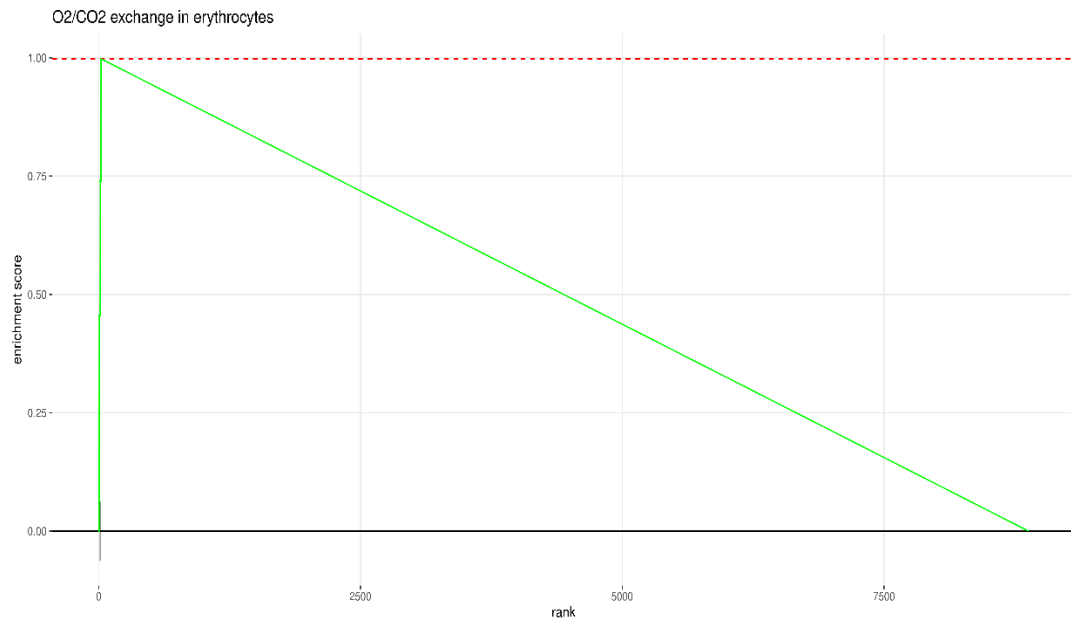

B.

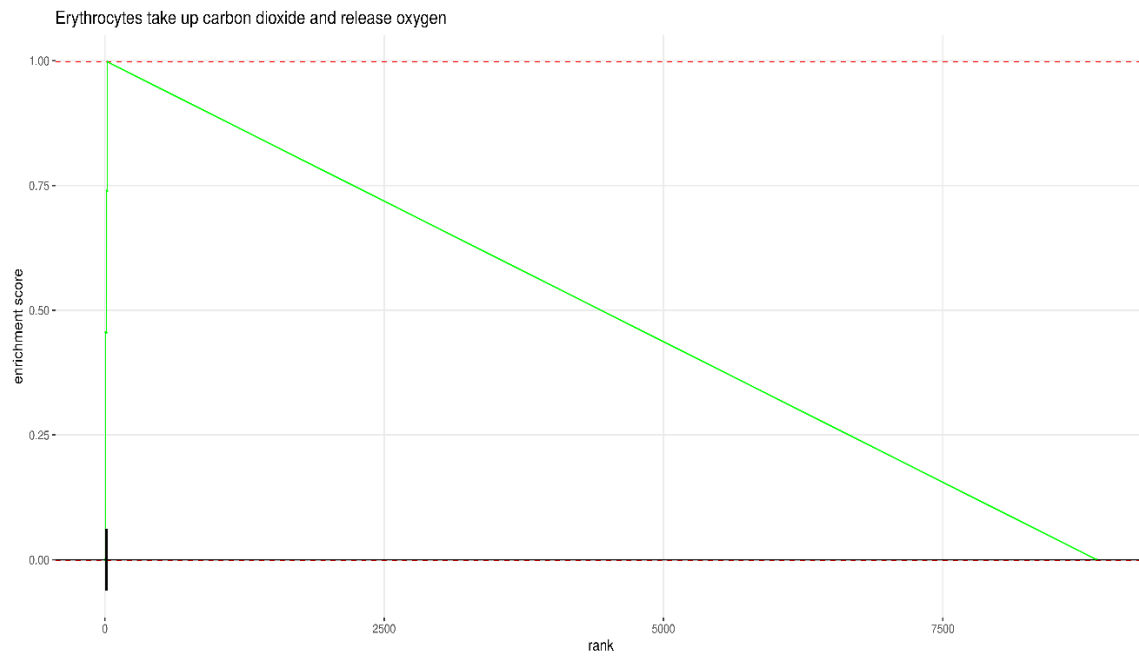

C.

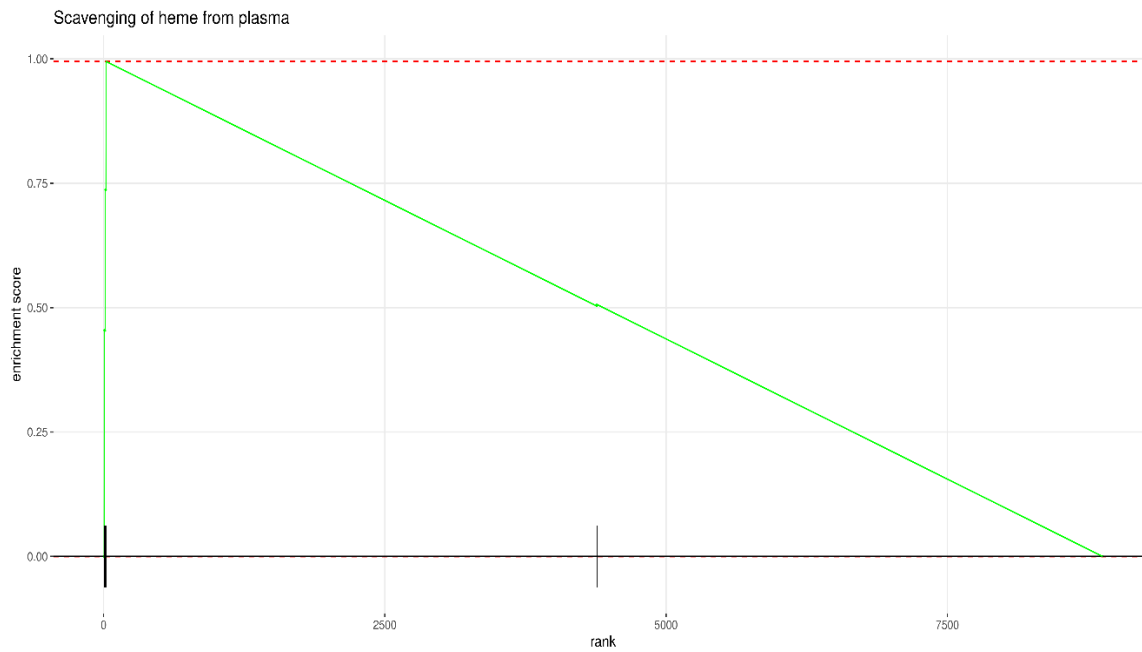

D.

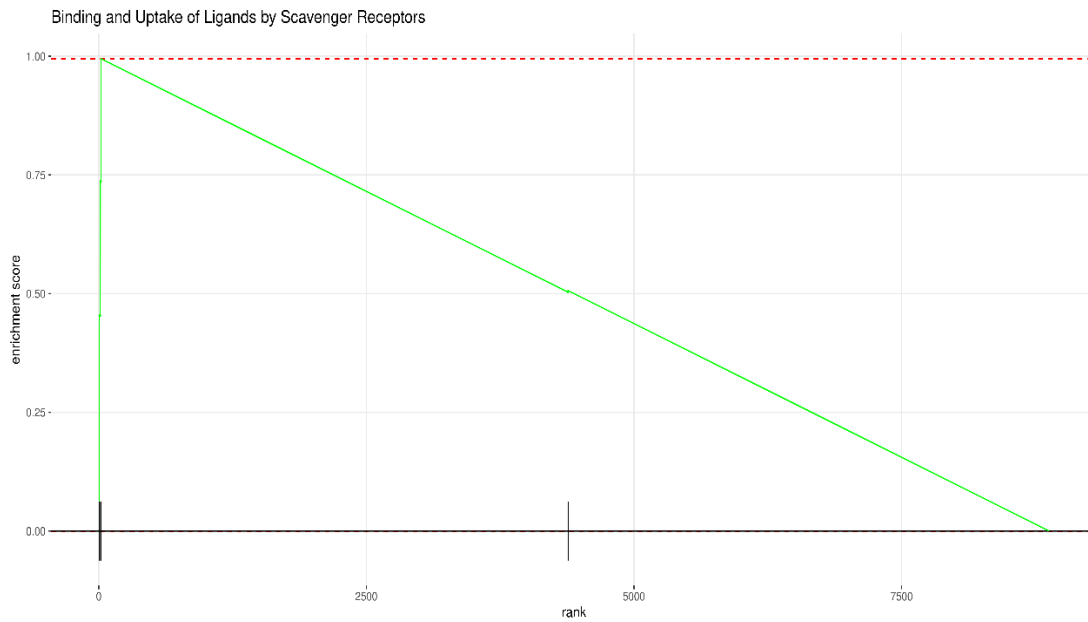

Figure 2. Gene set enrichment analysis (GSEA)-enrichment plots of representative pathways enriched in high-RFI compared to low-RFI beef steers;  $O_2/CO_2$  exchange in erythrocytes (A), erythrocytes take up carbon dioxide and release oxygen (B), scavenging of heme from plasma (C), and binding and uptake of ligands by scavenger receptors cellular response to external stimuli (D).
